# Supplementary material for: A Hypoxia Signature for Predicting Prognosis and Tumor Immune Microenvironment in Adrenocortical Carcinoma
Source: J Oncol. 2021 Sep 21;2021:2298973. doi: 10.1155/2021/2298973 (PMC8481041; doi:10.1155/2021/2298973)

Identification of 144  
hypoxia-related genes

Univariate cox analysis

33 hypoxia-related genes  
related to OS

Lasso regression analysis

13 hypoxia-related genes  
linked to OS

Multivariate cox analysis

prognostic model  
(3 hypoxia-related genes)

Independent  
prognosis analysis

K-M  
curve

GSEA

ROC  
curve

Immune  
microenvironment

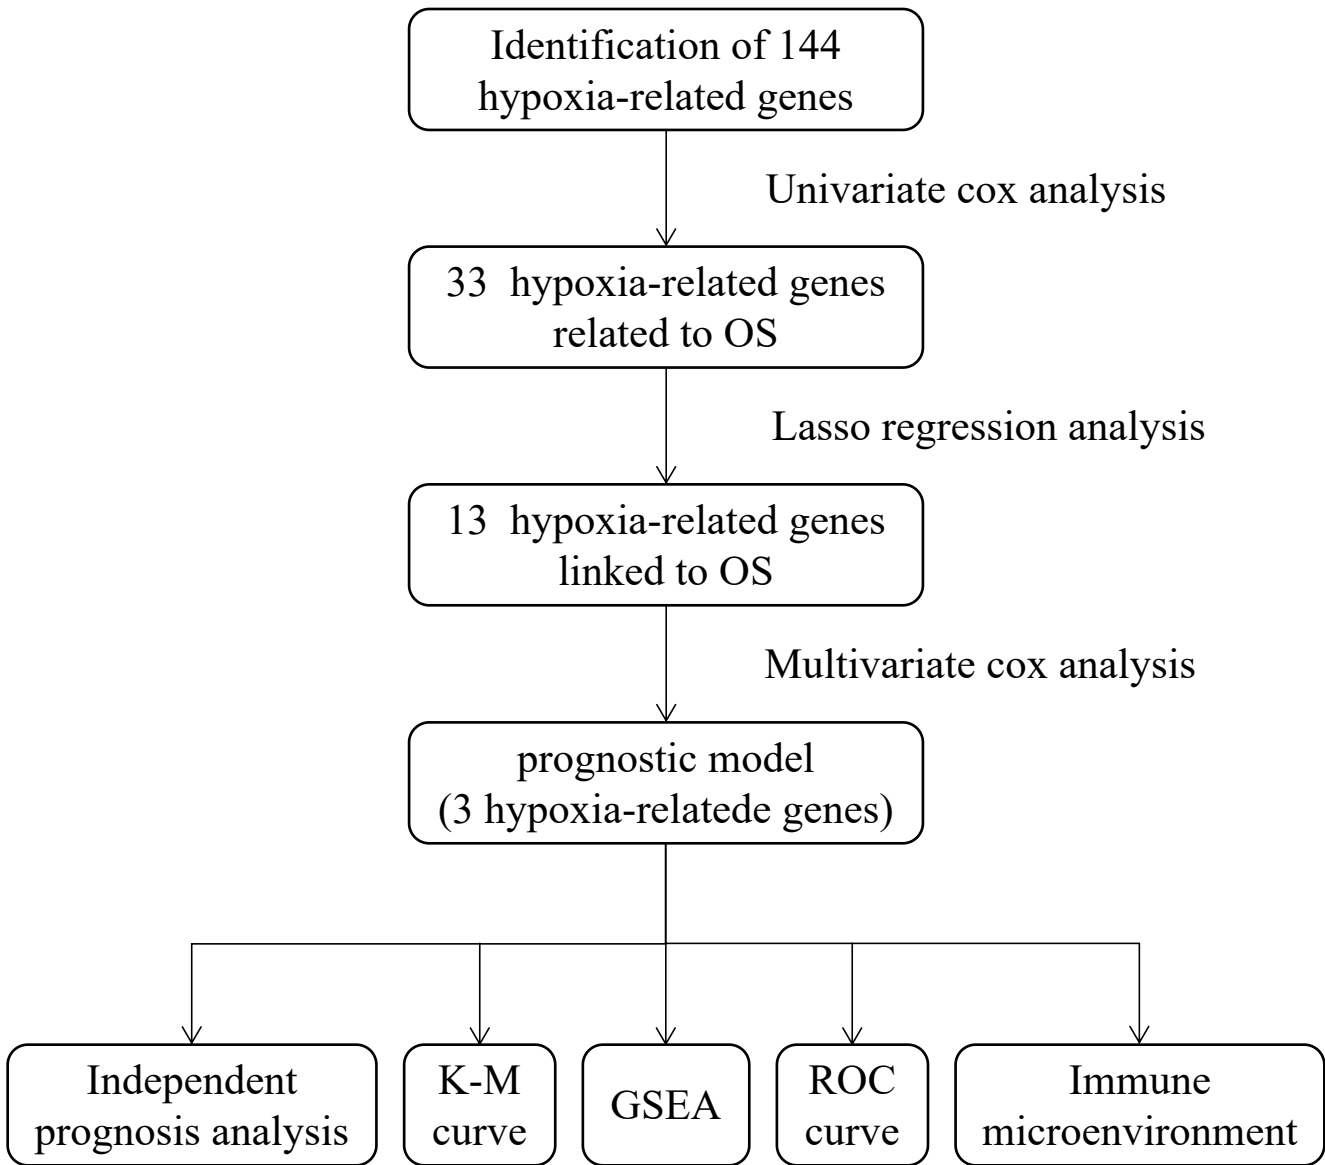

Supplement: Supplementary Materials — Figure S1: flowchart of the study. Table S1: clinical characteristics of ACC patients in TCGA and GEO. Figure S2: the expression of CCNA2, EFNA3, and COL5A1 in ACC tissues and normal adrenal tissues. [file 2298973.f1.zip › 2298973.f1/Supplementary Figure S1.pdf]
